# Supplementary material for: Synthesis and characterization of new 5,5′-dimethyl- and 5,5′-diphenylhydantoin-conjugated hemorphin derivatives designed as potential anticonvulsant agents
Source: Royal Society of Chemistry journal article supplement (doi:10.1039/d1nj05235g), 2022-01-01
Supplement: d1nj05235g1.pdf [file d1nj05235g1.pdf]

## Electronic Supplementary Information (ESI)

### Synthesis and characterization of new 5,5'-dimethyl- and 5,5'-diphenylhydantoin-conjugated hemorphin derivatives designed as potential anticonvulsant agents

*Petar Todorov<sup>1\*</sup>, Petia Peneva<sup>1</sup>, Stela Georgieva<sup>2</sup>, Jana Tchekalarova<sup>3</sup>, Miroslav Rangelov<sup>4</sup>, Nadezhda Todorova<sup>5</sup>*

<sup>1</sup>Department of Organic Chemistry, University of Chemical Technology and Metallurgy, 1756 Sofia, Bulgaria, e-mail: [pepi\\_37@abv.bg](mailto:pepi_37@abv.bg)

<sup>2</sup>Department of Analytical Chemistry, University of Chemical Technology and Metallurgy, 1756 Sofia, Bulgaria

<sup>3</sup>Institute of Neurobiology, Bulgarian Academy of Sciences, 1113 Sofia, Bulgaria

<sup>4</sup>Institute of Organic Chemistry with centre of phytochemistry, Bulgarian Academy of Sciences, 1113 Sofia, Bulgaria

<sup>5</sup>Institute of Biodiversity and Ecosystem Research, Bulgarian Academy of Sciences, 1113 Sofia, Bulgaria

| <b>Table of Contents:</b> |                                           | <b>Page</b> |
|---------------------------|-------------------------------------------|-------------|
| 1.                        | FTIR spectra of synthesized compounds     | S2          |
| 2.                        | Mass spectra of synthesized compounds     | S5          |
| 3.                        | Analytical HPLC chromatograms of peptides | S8          |

1. FTIR spectra of synthesized compounds.

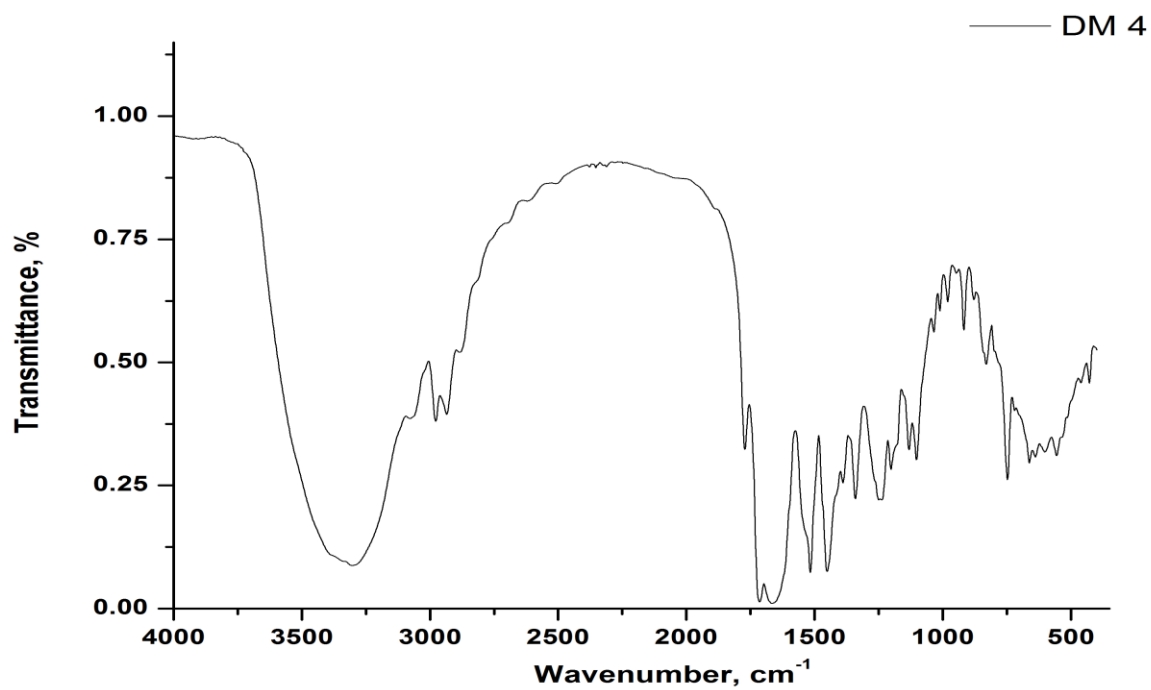

A) FTIR spectrum of *Dm-4*

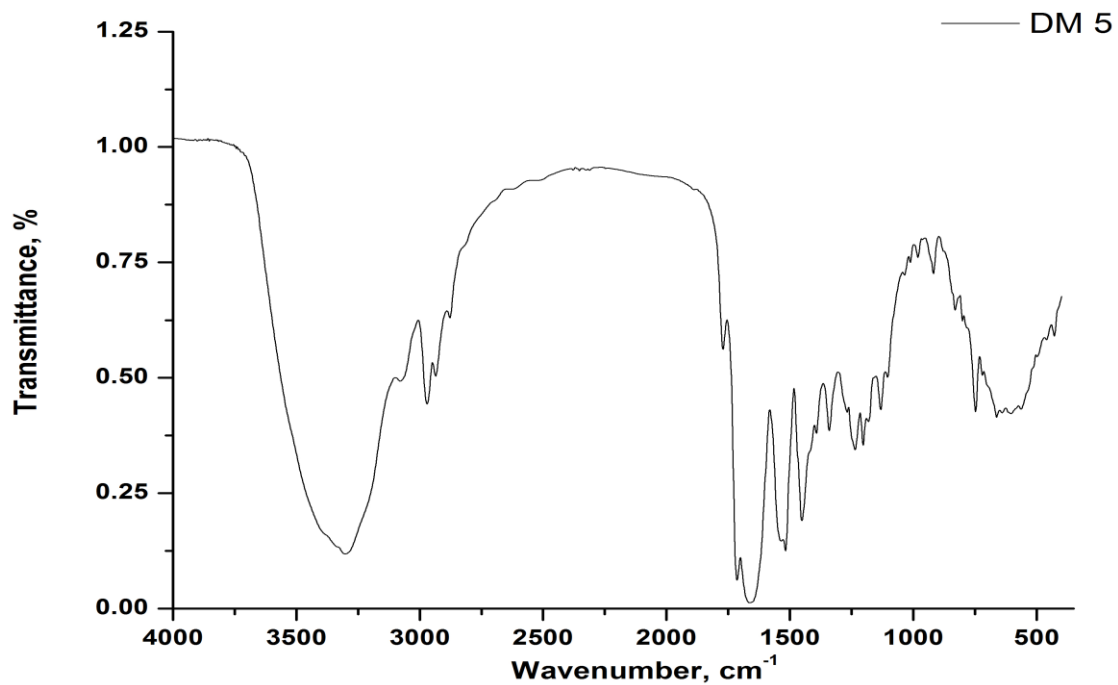

B) FTIR spectrum of *Dm-5*

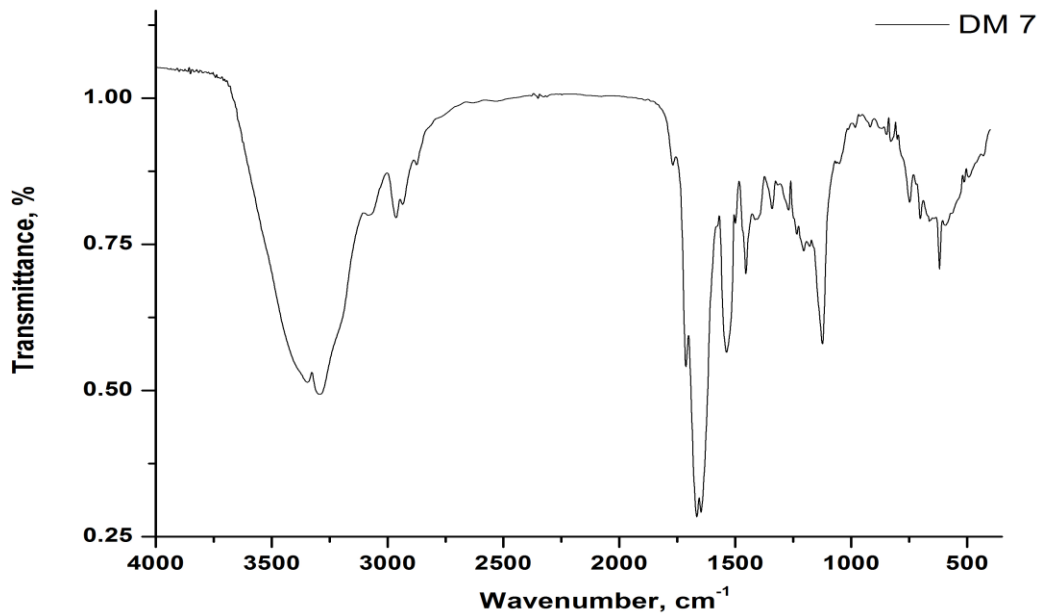

C) FTIR spectrum of **DM-7**

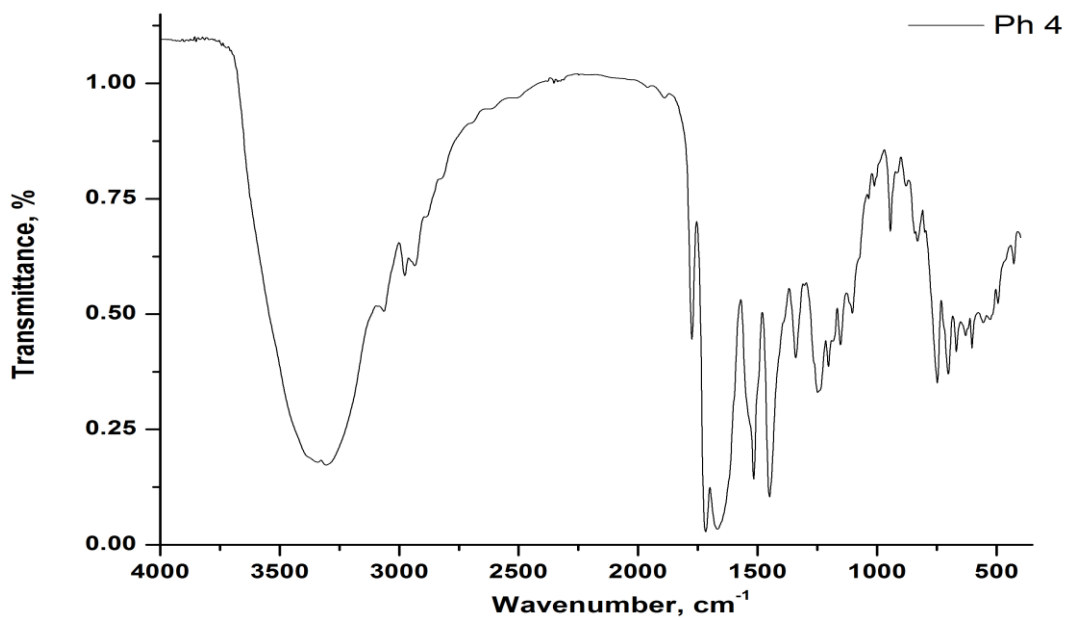

D) FTIR spectrum of **Ph-4**

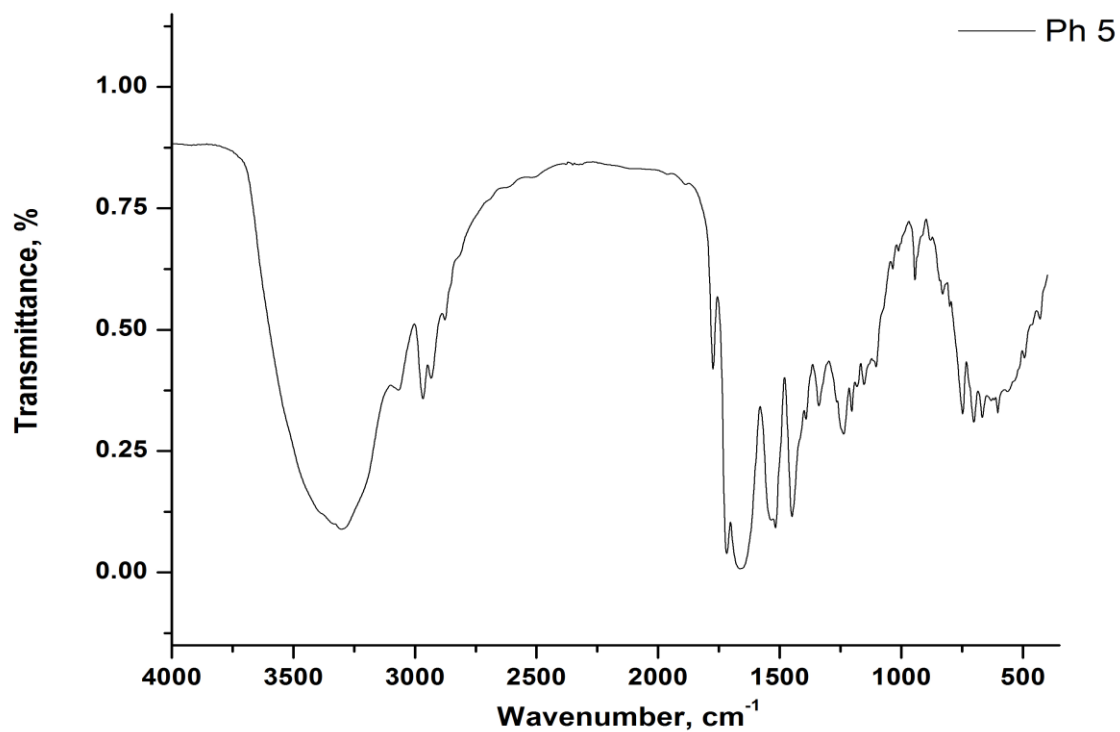

E) FTIR spectrum of **Ph-5**

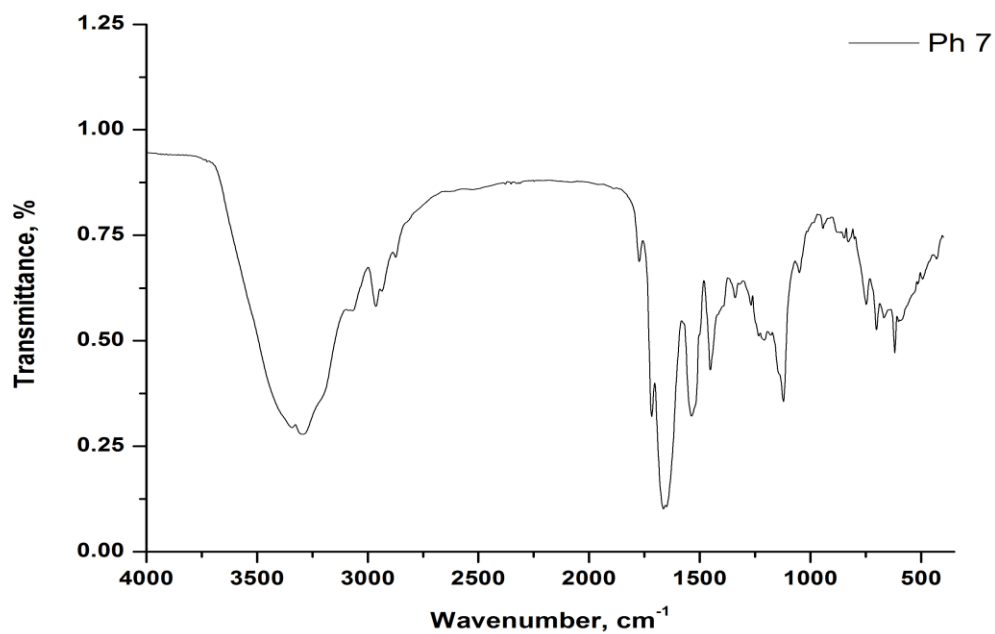

F) FTIR spectrum of **Ph-7**

**Fig. S1.** FTIR spectra of new peptide analogues (**Dm-4**, **Ph-4**, **Dm-5**, **Ph-5**, **Dm-7** and **Ph-7**) with wavenumber interval: 500-4000 cm<sup>-1</sup>.

## 2. Mass spectra of synthesized compounds

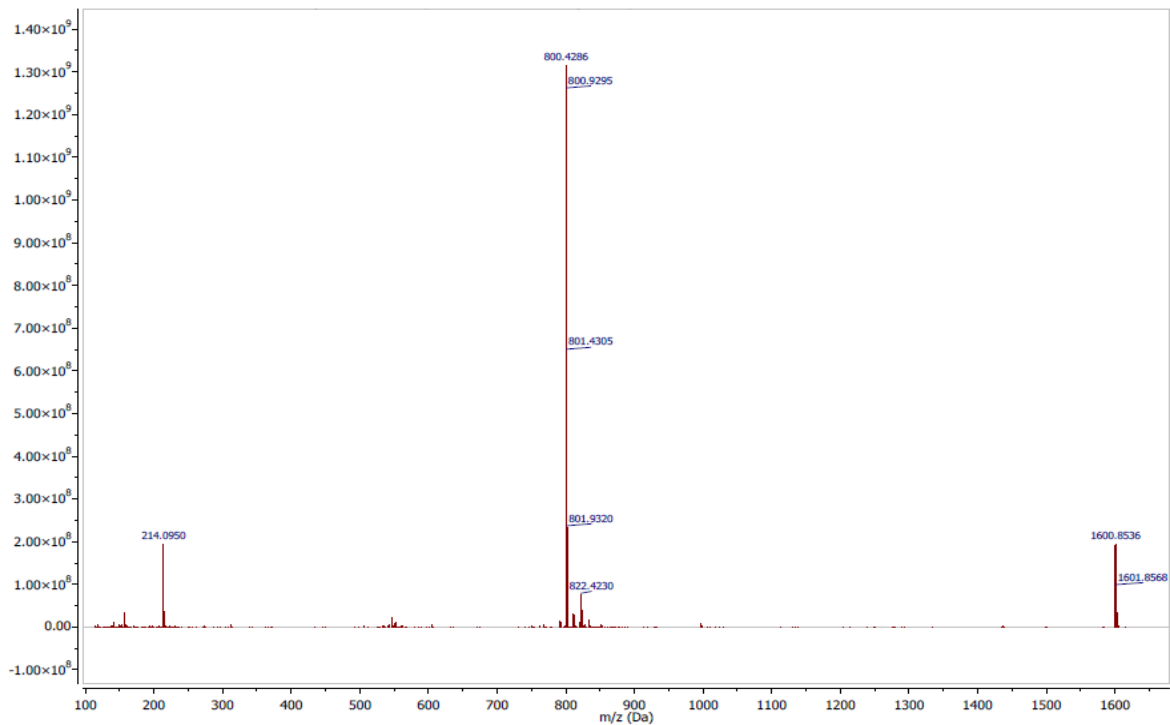

A) ESI-MS spectrum of **Dm-4**

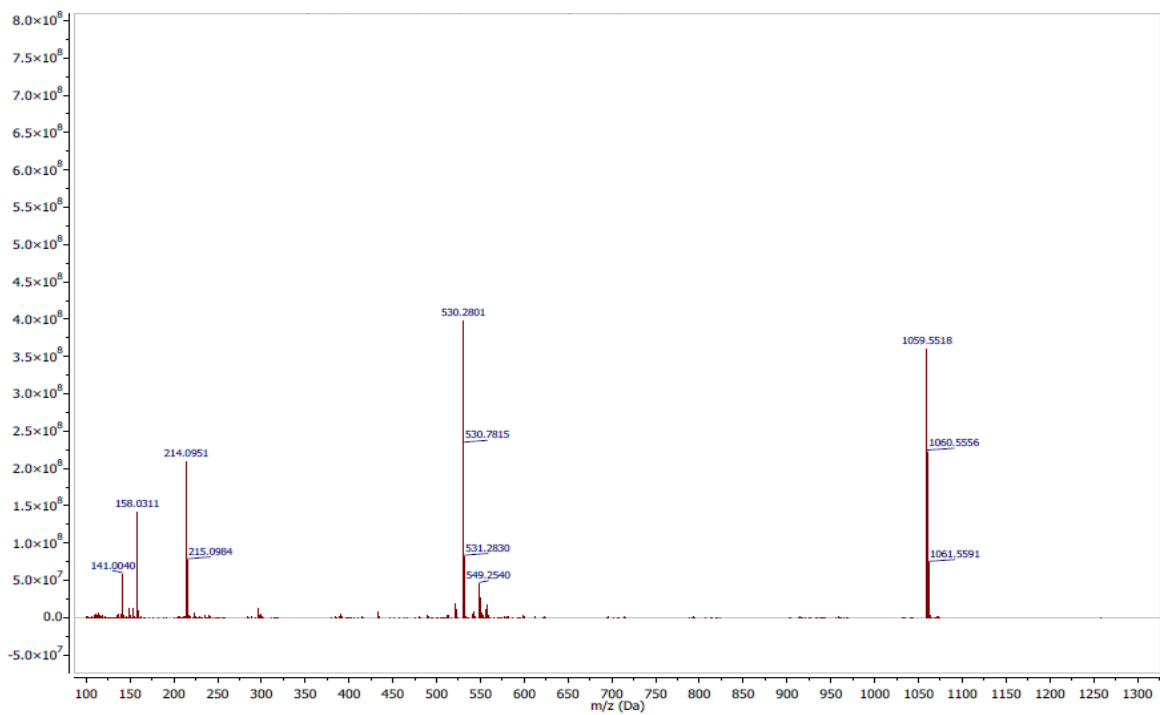

B) ESI-MS spectrum of **Dm-5**

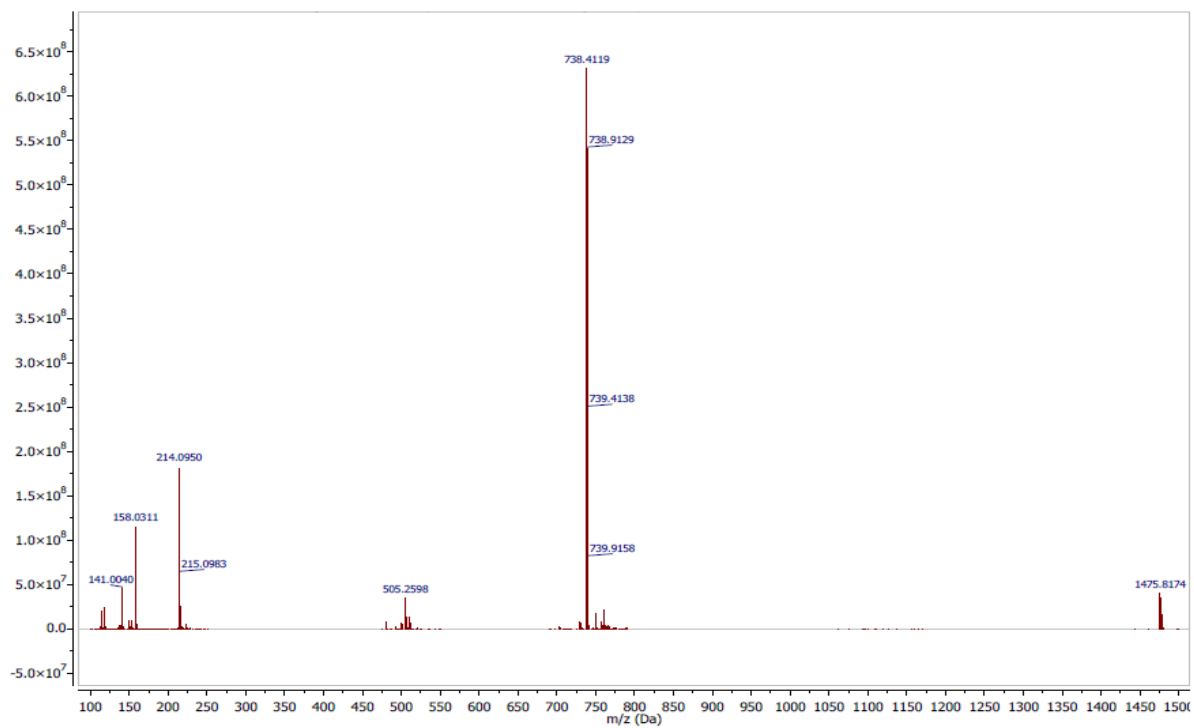

C) ESI-MS spectrum of **Dm-7**

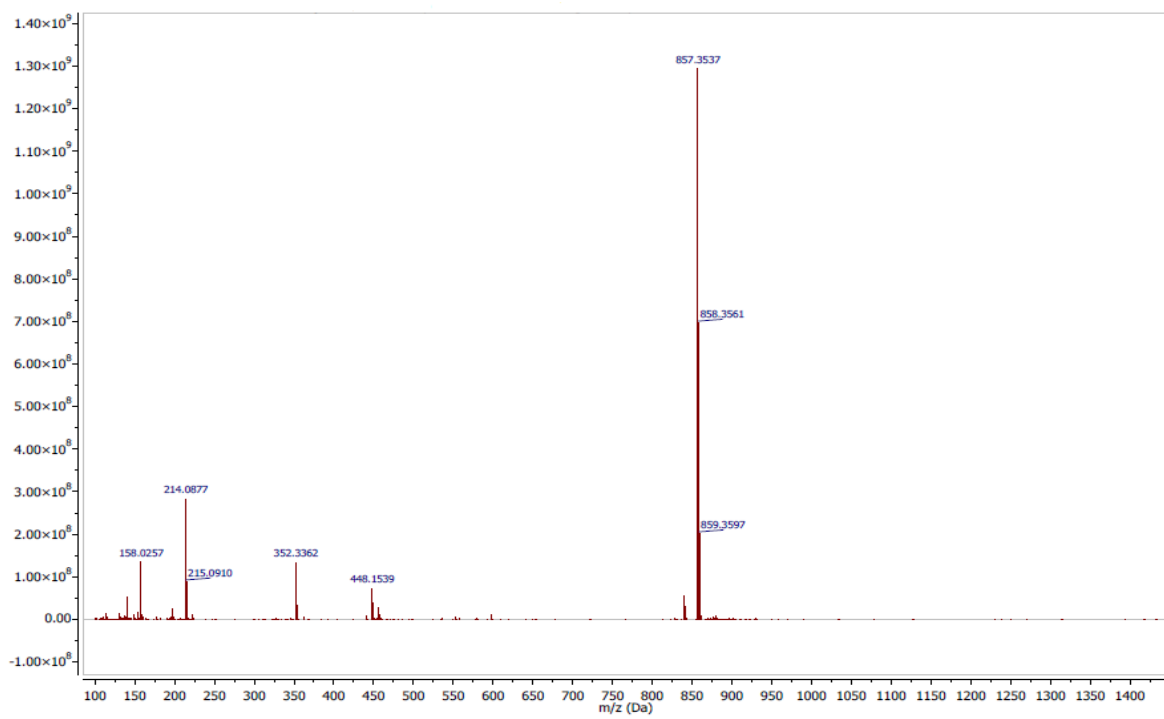

D) ESI-MS spectrum of **Ph-4**

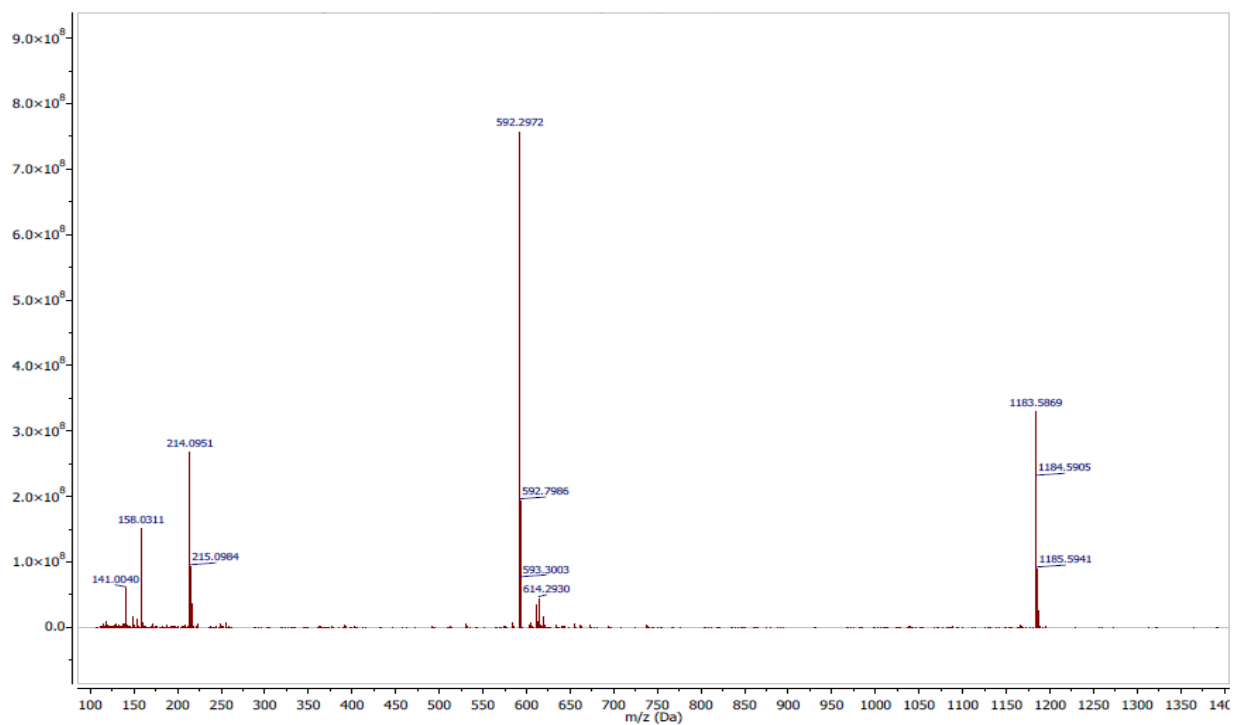

E) ESI-MS spectrum of **Ph-5**

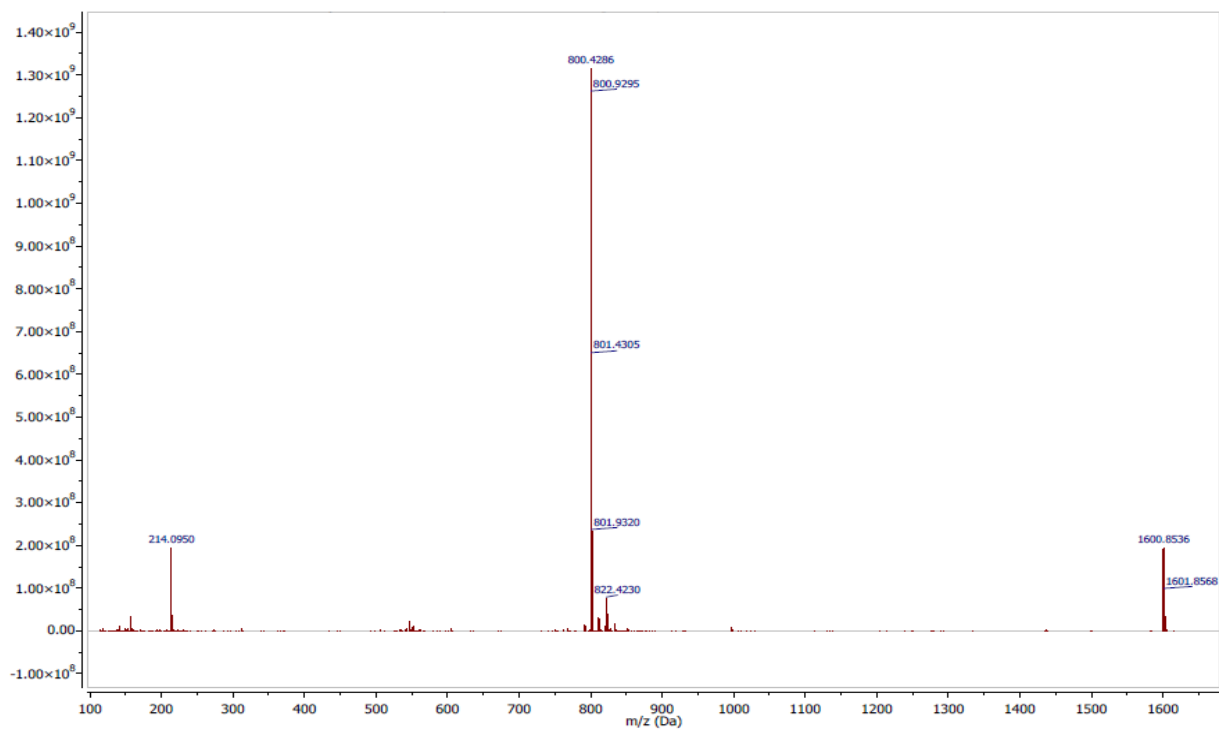

F) ESI-MS spectrum of **Ph-7**

**Fig. S2.** ESI-MS spectra of new peptide analogues (**Dm-4**, **Ph-4**, **Dm-5**, **Ph-5**, **Dm-7** and **Ph-7**)

### 3. Analytical HPLC chromatograms of peptides.

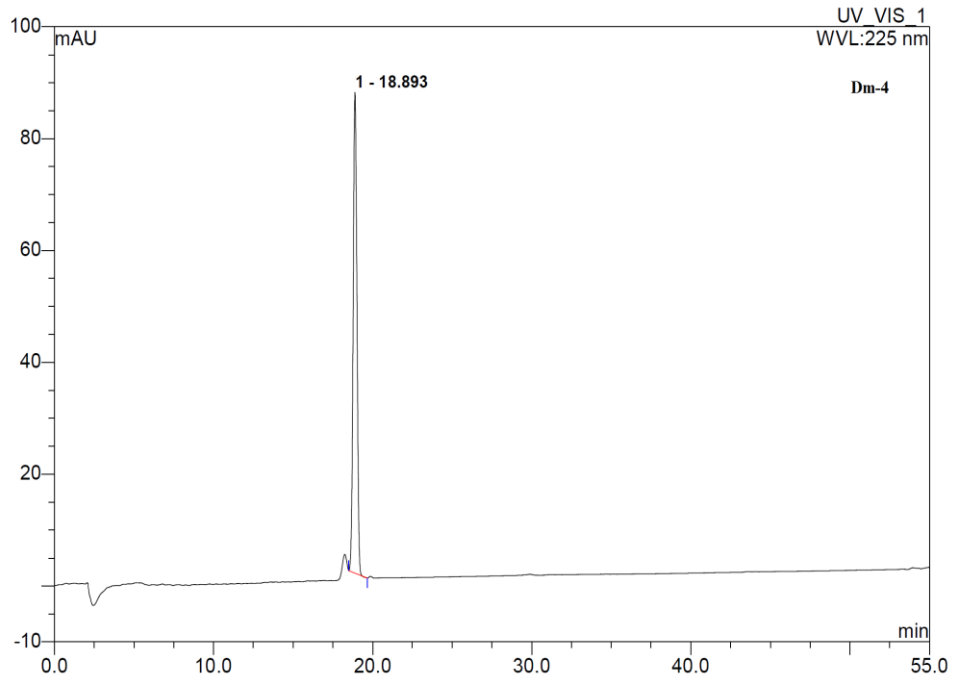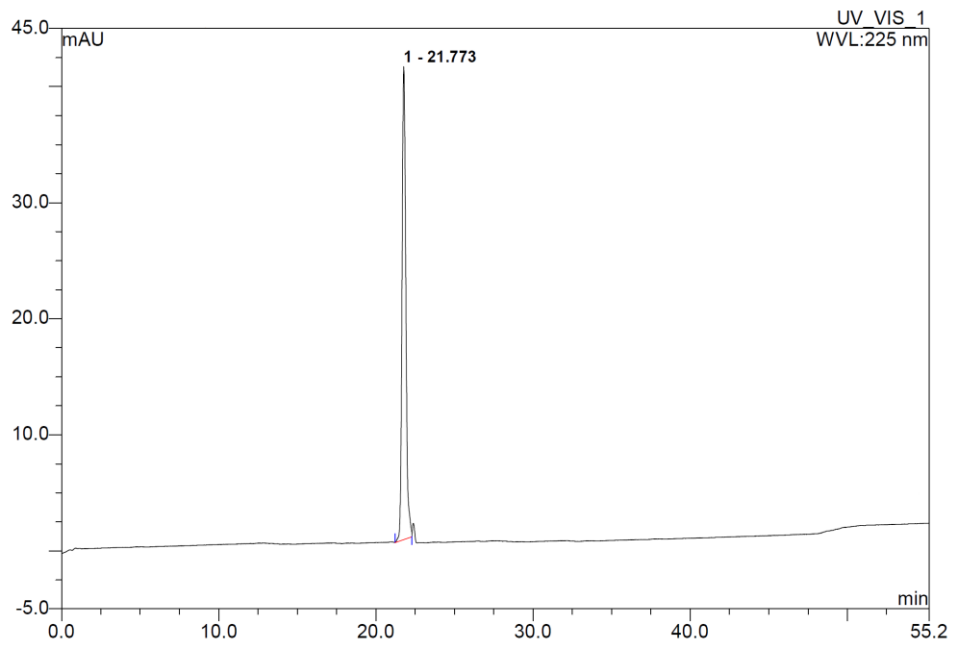



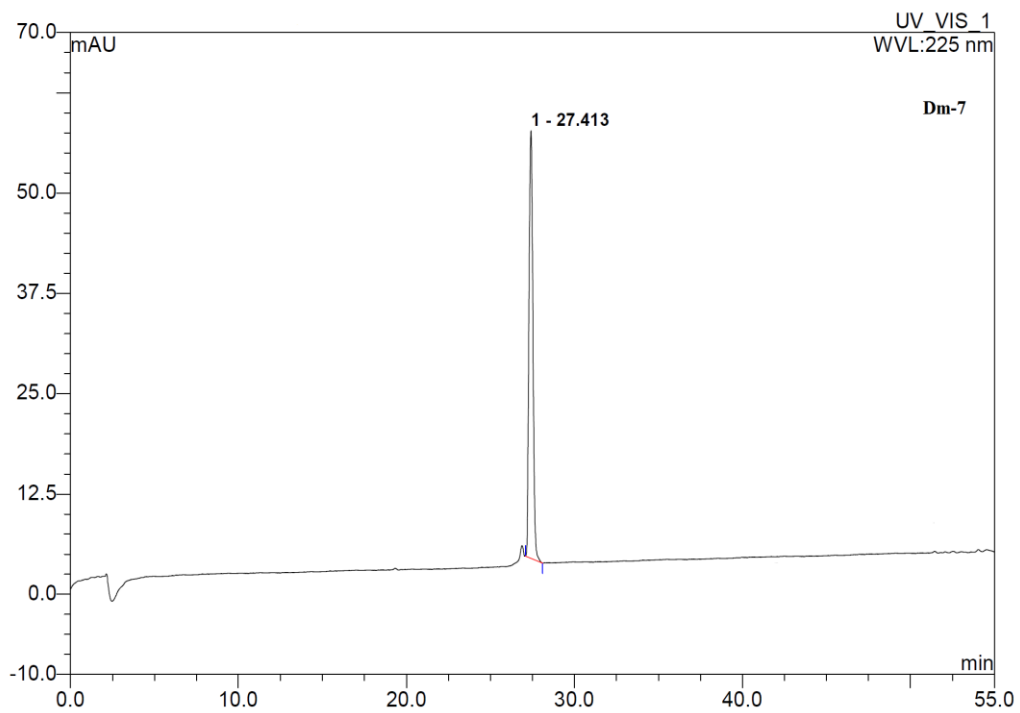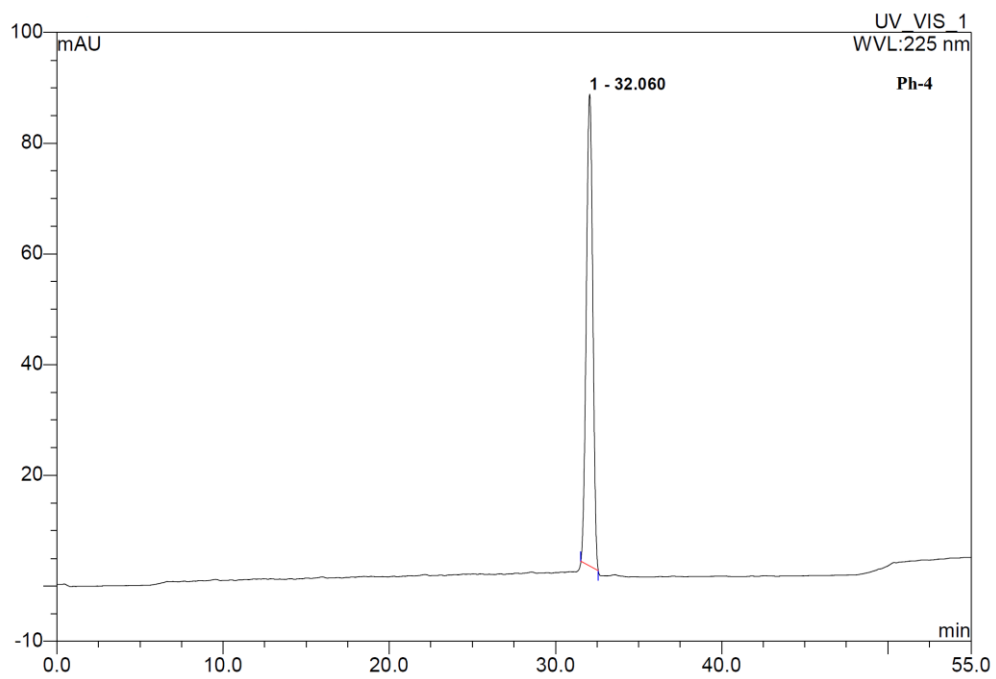

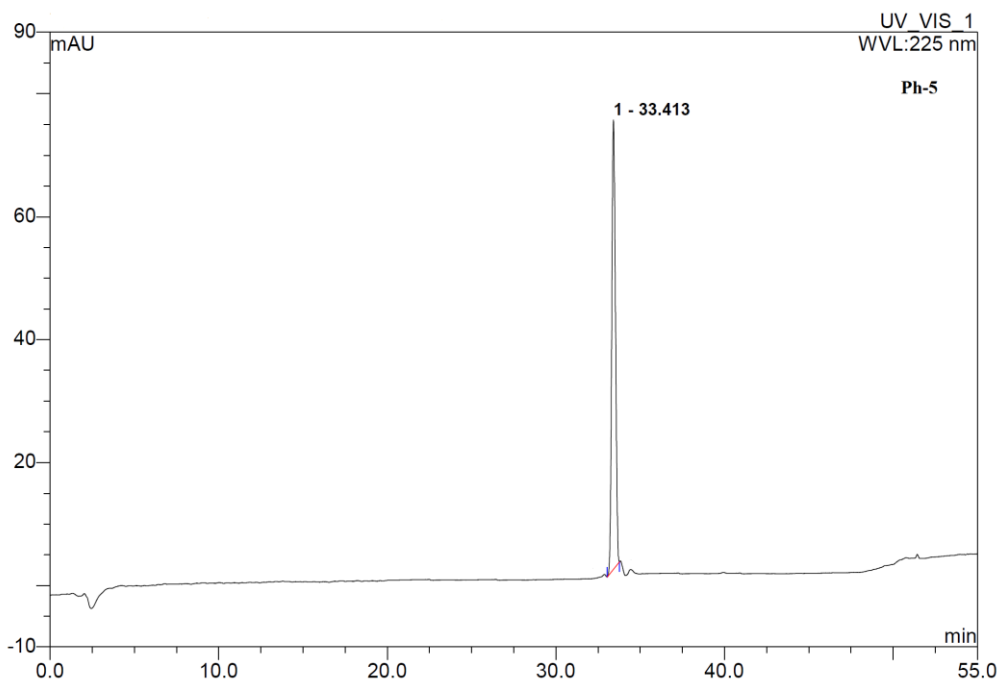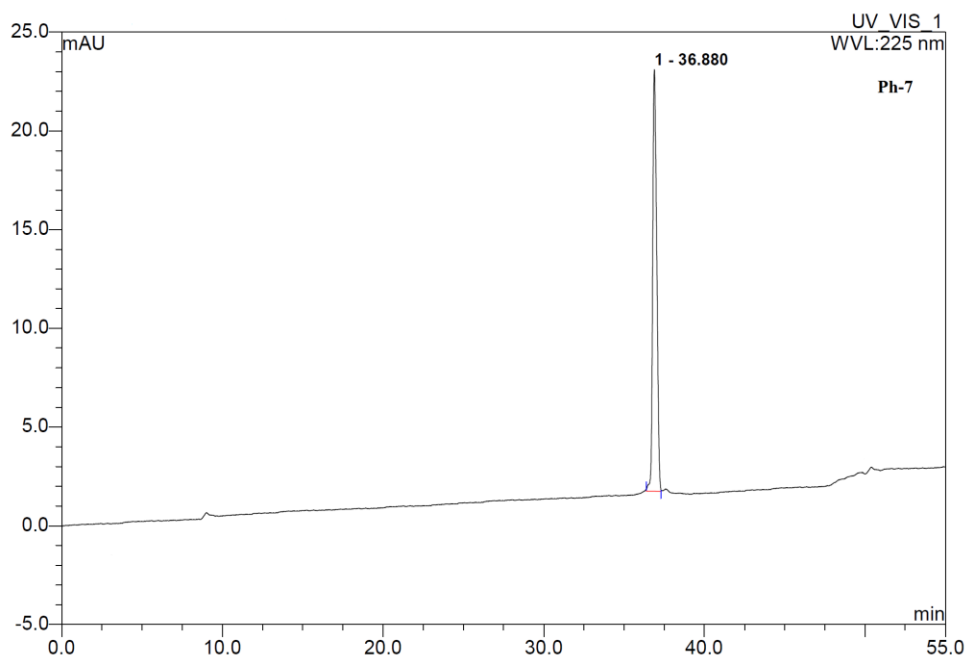

**Fig. S3.** Analytical HPLC chromatograms of peptides
